# Supplementary material
Source: PubMed Central journal article supplement (PMC8651054)

1 **Supplemental Materials**

2 ***APOL1* Genetic Variants are Associated with Increased Risk**  
3 **of Coronary Atherosclerotic Plaque Rupture in African**  
4 **Americans**  
5

6 Anne Cornelissen<sup>1,2</sup>, Daniela T. Fuller<sup>1</sup>, Raquel Fernandez<sup>1</sup>, Xiaoqing Zhao<sup>1</sup>, Robert Kutys<sup>1</sup>,  
7 Elizabeth Binns-Roemer<sup>3</sup>, Marco Delsante<sup>4,5</sup>, Atsushi Sakamoto<sup>1</sup>, Ka Hyun Paek<sup>1</sup>, Yu Sato<sup>1</sup>,  
8 Rika Kawakami<sup>1</sup>, Masayuki Mori<sup>1</sup>, Kenji Kawai<sup>1</sup>, Teruhiko Yoshida<sup>4</sup>, Khun Zaw Latt<sup>4</sup>, Clint L.  
9 Miller<sup>6</sup>, Paul S. de Vries<sup>7</sup>, Frank D. Kolodgie<sup>1</sup>, Renu Virmani<sup>1</sup>, Myung Kyun Shin<sup>8</sup>, Maarten  
10 Hoek<sup>8</sup>, Jurgen Heymann<sup>4</sup>, Jeffrey B. Kopp<sup>4</sup>, Avi Z. Rosenberg<sup>4,9</sup>, Harry R. Davis<sup>1</sup>, Liang Guo<sup>1\*</sup>,  
11 Alope V. Finn<sup>1,10\*</sup>.

12 <sup>1</sup> CVPPath Institute, Gaithersburg, Maryland, USA

13 <sup>2</sup> University Hospital RWTH Aachen, Department of Cardiology, Aachen, Germany

14 <sup>3</sup> Center for Cancer Research, National Cancer Institute, National Institutes of Health, Frederick,  
15 Maryland, USA

16 <sup>4</sup> Kidney Disease Section, National Institute of Diabetes and Digestive and Kidney Diseases,  
17 National Institutes of Health, Bethesda, Maryland, USA

18 <sup>5</sup> Dipartimento di Medicina e Chirurgia Università di Parma, UO Nefrologia, Azienda  
19 Ospedaliera-Universitaria, Parma, Italy

20 <sup>6</sup> Center for Public Health Genomics, Department of Public Health Sciences, University of  
21 Virginia School of Medicine, Charlottesville, Virginia, USA

22 <sup>7</sup> Human Genetics Center, Department of Epidemiology, Human Genetics, and Environmental  
23 Sciences, School of Public Health, The University of Texas Health Science Center at Houston,  
24 Houston, TX, USA

25 <sup>8</sup> Merck & Co., Kenilworth, New Jersey, USA

26 <sup>9</sup> Department of Pathology, Johns Hopkins University School of Medicine, Baltimore, Maryland,  
27 USA

28 <sup>10</sup> School of Medicine, University of Maryland School of Medicine, Baltimore, Maryland, USA  
29

30 Running title: *APOL1* Variants and Coronary Plaque Rupture.

31

32 **\*Correspondence:**

33 Alope Finn, MD or Liang Guo, PhD

34 CVPPath Institute

35 19 Firstfield Road

36 Gaithersburg, MD 20878

37 TEL: (301) 208-3570, FAX: (301) 208-3745

38 Email: [afinn@CVPPath.org](mailto:afinn@CVPPath.org) or [lguo@CVPPath.org](mailto:lguo@CVPPath.org)

## 39 Supplemental Figures

40 **Supplemental Figure I: Exemplary ROIs.** Lumen areas are outlined in red, external elastic  
41 lamina areas are circled in yellow, and necrotic core areas are highlighted in green. **A-C)** Stable  
42 control human coronary arteries of carriers of the reference allele (**A**), 1 *APOL1* risk allele (**B**),  
43 and 2 *APOL1* risk alleles (**C**). **D-F)** Ruptured coronary arteries of carriers of the reference allele  
44 (**D**), 1 *APOL1* risk allele (**E**), and 2 *APOL1* risk alleles (**F**).

45

### 46 **Supplemental Figure II: Immunofluorescent Staining for Apolipoprotein A1.**

47 Representative confocal microscopy images with staining against APOA1 (red) in stable (**A**) and  
48 in ruptured (**B**) human coronary artery plaques. APOA1-positive plaque area was similar  
49 regardless of *APOL1* genotype, both in severely narrowed stable plaques (**C**) and in ruptured  
50 plaques (**D**). **E**) APOA1-positive plaque area was positively correlated with *APOL1*-positive  
51 plaque area.

52

53 **Supplemental Figure III: Assessment of Apoptosis. A+B)** Representative confocal  
54 microscopy images with staining against cleaved caspase 3 (red), CD68 (green), and DAPI  
55 (blue) in stable (**A**) and in ruptured (**B**) human coronary plaques. The red boxed areas in the  
56 MOVAT-stained low-power image indicate the areas where confocal microscopy images were  
57 taken. Cleaved caspase 3-positivity co-localized primarily with CD68-positive cells. **C+D)** There  
58 were no differences in cleaved caspase 3-positive plaque areas among the three *APOL1*  
59 genotypes in stable (**C**) and in ruptured (**D**) plaques. Likewise, there were no differences in  
60 CD68-positivity, indicating macrophage infiltration. **E+F)** TUNEL staining in stable (**E**) and in  
61 ruptured (**F**) human coronary plaques. The microphotographs were obtained from the boxed  
62 areas in the MOVAT-stained low-power images, shown in **A+B**). **G+H)** TUNEL-positive plaque  
63 areas were not significantly different in plaques from carriers of the reference allele versus  
64 carriers of one or two *APOL1* risk alleles.

65

66

## 67 Supplemental Tables

## 68 Supplemental Table I: Major Resources Table

69

## 70 Antibodies

| Target antigen    | Vendor or Source          | Catalog # | Working concentration | Lot # (preferred but not required) | Persistent ID / URL                                                                                                                                                                                                                                                                                                                                                                                                       |
|-------------------|---------------------------|-----------|-----------------------|------------------------------------|---------------------------------------------------------------------------------------------------------------------------------------------------------------------------------------------------------------------------------------------------------------------------------------------------------------------------------------------------------------------------------------------------------------------------|
| CD68              | Dako                      | M0814     | 1:200                 | 20047711                           | <a href="https://www.agilent.com/en/product/immunohistochemistry/antibodies-controls/primary-antibodies/cd68-(concentrate)-76535">https://www.agilent.com/en/product/immunohistochemistry/antibodies-controls/primary-antibodies/cd68-(concentrate)-76535</a>                                                                                                                                                             |
| Apolipoprotein L1 | Sigma                     | HPA018885 | 1:500                 | G117317                            | <a href="https://www.sigmaaldrich.com/catalog/product/sigma/hpa018885?lang=en&amp;region=US">https://www.sigmaaldrich.com/catalog/product/sigma/hpa018885?lang=en&amp;region=US</a>                                                                                                                                                                                                                                       |
| Apolipoprotein A1 | Sigma                     | HPA046715 | 1:5000                | A117438                            | <a href="https://www.sigmaaldrich.com/catalog/product/sigma/hpa046715?lang=en&amp;region=US">https://www.sigmaaldrich.com/catalog/product/sigma/hpa046715?lang=en&amp;region=US</a>                                                                                                                                                                                                                                       |
| Cleaved Caspase 3 | Cell Signaling Technology | 9664S     | 1:500                 | 2                                  | <a href="https://www.cellsignal.com/products/primary-antibodies/cleaved-caspase-3-asp175-5a1e-rabbit-mab/9664?site-search-type=Products&amp;N=4294956287&amp;Nt=+cleaved+caspase+3+%28d175%29&amp;fromPage=plp">https://www.cellsignal.com/products/primary-antibodies/cleaved-caspase-3-asp175-5a1e-rabbit-mab/9664?site-search-type=Products&amp;N=4294956287&amp;Nt=+cleaved+caspase+3+%28d175%29&amp;fromPage=plp</a> |

71

Supplemental Table II: Study Population Characteristics per *APOL1* Risk Alleles

|                                                | Total Study Cohort, n=764 | Reference Allele, n=312 | 1 <i>APOL1</i> Risk Allele, n=347 | 2 <i>APOL1</i> Risk Alleles, n=105 | p-value* (un-adjusted) |
|------------------------------------------------|---------------------------|-------------------------|-----------------------------------|------------------------------------|------------------------|
| <b>Demographics</b>                            |                           |                         |                                   |                                    |                        |
| Age (mean ± SD)                                | 47.18 ± 12.75             | 47.57 ± 13.44           | 46.58 ± 12.62                     | 48.02 ± 10.96                      | 0.4662                 |
| Male Sex                                       | 524 (68.6%)               | 206 (66.0%)             | 239 (68.9%)                       | 79 (75.2%)                         | 0.2102                 |
| BMI, kg/m <sup>2</sup> (mean ± SD)             | 30.03 ± 8.36              | 30.51 ± 8.68            | 29.88 ± 8.11                      | 29.07 ± 8.15                       | 0.2825                 |
| <b>Risk factors</b>                            |                           |                         |                                   |                                    |                        |
| Hypertension                                   | 488 (63.9%)               | 193 (61.9%)             | 225 (64.8%)                       | 70 (66.7%)                         | 0.5931                 |
| Hyperlipidemia                                 | 120 (15.7%)               | 44 (14.1%)              | 58 (16.7%)                        | 18 (17.1%)                         | 0.5956                 |
| Diabetes Mellitus                              | 117 (15.3%)               | 47 (15.1%)              | 50 (14.4%)                        | 20 (19.0%)                         | 0.5059                 |
| Smoking                                        | 65 (8.5%)                 | 24 (7.7%)               | 33 (9.5%)                         | 8 (7.6%)                           | 0.6633                 |
| Kidney disease                                 | 60 (7.9%)                 | 19 (6.1%)               | 29 (8.4%)                         | 12 (11.4%)                         | 0.1904                 |
| Dialysis                                       | 34 (4.5%)                 | 8 (2.6%)                | 18 (5.2%)                         | 8 (7.6%)                           | 0.0629                 |
| History of drug abuse                          | 120 (15.7%)               | 53 (17.0%)              | 53 (15.3%)                        | 14 (13.3%)                         | 0.6433                 |
| Serum Total Cholesterol (mg/dL)                | 201.91 ± 72.63 (n=179)    | 198.24 ± 61.65 (n=74)   | 207.93 ± 87.71 (n=81)             | 192.92 ± 41.74 (n=24)              | 0.5760                 |
| Serum HDL Cholesterol (mg/dL)                  | 42.56 ± 1.92 (n=140)      | 44.76 ± 3.05 (n=60)     | 42.24 ± 2.85 (n=63)               | 36.00 ± 4.59 (n=17)                | 0.2253                 |
| Serum APOA1 (mg/dL)                            | 138.1 ± 7.48 (n=48)       | 141.1 ± 14.62 (n=16)    | 140.2 ± 9.75 (n=27)               | 116.7 ± 16.74 (n=5)                | 0.6302                 |
| Serum Creatinine (mg/dL)                       | 2.58 ± 1.88 (n=333)       | 2.60 ± 2.17 (n=136)     | 2.54 ± 1.74 (n=153)               | 2.62 ± 1.29 (n=44)                 | 0.9478                 |
| <b>Cause of Death</b>                          |                           |                         |                                   |                                    |                        |
| Sudden Cardiac Death                           | 590 (77.2%)               | 231 (74.0%)             | 272 (78.4%)                       | 87 (82.9%)                         | 0.1380                 |
| Coronary Death                                 | 293 (38.4%)               | 111 (35.6%)             | 138 (39.8%)                       | 44 (41.9%)                         | 0.3923                 |
| Intracoronary Thrombosis                       | 185 (24.2%)               | 62 (19.9%)              | 96 (27.7%)                        | 27 (25.7%)                         | 0.0612                 |
| <i>Rupture</i>                                 | 124 (16.2%)               | 39 (12.5%)              | 61 (17.6%)                        | 24 (22.9%)                         | 0.0295                 |
| <i>Erosion</i>                                 | 57 (7.5%)                 | 22 (7.1%)               | 32 (9.2%)                         | 3 (2.9%)                           | 0.0881                 |
| <i>Calcified Nodules</i>                       | 4 (0.5%)                  | 1 (0.3%)                | 3 (0.9%)                          | 0 (0.0%)                           | NA                     |
| Non-thrombotic CAD                             | 106 (13.9%)               | 47 (15.1%)              | 42 (12.1%)                        | 17 (16.2%)                         | 0.4166                 |
| Coronary Dissection                            | 2 (0.3%)                  | 2 (0.6%)                | 0 (0.0%)                          | 0 (0.0%)                           | NA                     |
| Cardiac but Non-Coronary Death                 | 297 (38.9%)               | 120 (38.5%)             | 134 (38.6%)                       | 43 (41.0%)                         | 0.8945                 |
| Sudden Non-Cardiac Death                       | 174 (22.8%)               | 81 (26.0%)              | 75 (21.6%)                        | 18 (17.1%)                         | 0.1380                 |
| <b>Degree of Atherosclerosis</b>               |                           |                         |                                   |                                    |                        |
| None (0 - 24% cross-sectional stenosis)        | 271 (35.5%)               | 110 (35.3%)             | 124 (35.7%)                       | 37 (35.2%)                         | 0.9904                 |
| Mild (25 – 50% cross-sectional stenosis)       | 74 (9.7%)                 | 33 (10.5%)              | 30 (8.7%)                         | 11 (10.5%)                         | 0.6745                 |
| Moderate (50 – 74% cross-sectional stenosis)   | 122 (16.0%)               | 51 (16.3%)              | 58 (16.7%)                        | 13 (12.4%)                         | 0.5531                 |
| Severe (≥75% cross-sectional stenosis)         | 279 (38.9%)               | 118 (37.8%)             | 135 (38.9%)                       | 44 (41.9%)                         | 0.7589                 |
| <b>Mean %cross-sectional luminal narrowing</b> |                           |                         |                                   |                                    |                        |
| LAD (%)                                        | 39.81 ± 36.65             | 39.71 ± 36.55           | 40.01 ± 36.68                     | 39.43 ± 37.19                      | 0.9880                 |

|         |               |               |               |               |        |
|---------|---------------|---------------|---------------|---------------|--------|
| LCA (%) | 30.24 ± 35.99 | 30.05 ± 35.39 | 31.01 ± 36.61 | 28.24 ± 35.90 | 0.7825 |
| RCA (%) | 34.87 ± 37.06 | 32.80 ± 36.12 | 36.23 ± 37.83 | 36.52 ± 37.32 | 0.4405 |

| Number of vessels with any atherosclerosis |             |             |             |            |        |
|--------------------------------------------|-------------|-------------|-------------|------------|--------|
| 0                                          | 278 (36.4%) | 112 (35.9%) | 127 (36.6%) | 39 (37.1%) | 0.9680 |
| 1                                          | 85 (11.1%)  | 38 (12.2%)  | 35 (10.1%)  | 12 (11.4%) | 0.6910 |
| 2                                          | 78 (10.2%)  | 30 (9.6%)   | 37 (10.7%)  | 11 (10.5%) | 0.9021 |
| 3                                          | 321 (42.0%) | 131 (42.0%) | 147 (42.4%) | 43 (41.0%) | 0.9675 |
| NA                                         | 2 (0.3%)    | 1 (0.3%)    | 1 (0.3%)    | 0 (0.0%)   | NA     |

  

| Number of vessels with cross-sectional luminal narrowing ≥75% in histology |             |             |             |            |        |
|----------------------------------------------------------------------------|-------------|-------------|-------------|------------|--------|
| 0                                                                          | 467 (61.1%) | 194 (62.2%) | 212 (61.1%) | 61 (58.1%) | 0.7589 |
| 1                                                                          | 107 (14.0%) | 48 (15.4%)  | 44 (12.7%)  | 15 (14.3%) | 0.6048 |
| 2                                                                          | 114 (14.9%) | 45 (14.4%)  | 54 (15.6%)  | 15 (14.3%) | 0.9019 |
| 3                                                                          | 76 (9.9%)   | 25 (8.0%)   | 37 (10.7%)  | 14 (13.3%) | 0.2410 |

73 \* p values are calculated by comparison between carriers of the reference allele, carriers of 1  
74 *APOL1* risk allele, and carriers of 2 *APOL1* risk alleles. CAD: coronary artery disease; LAD: left  
75 anterior descending coronary artery; LCA: left circumflex coronary artery; RCA: right coronary  
76 artery; LV: left ventricle; RV: right ventricle; MI: myocardial infarction; NA: not available.

77

78 **Supplemental Table III: Kidney Pathology**

|                                            | Reference Allele<br>n=45 | 2 <i>APOL1</i> Risk Alleles<br>n=46 | p-value |
|--------------------------------------------|--------------------------|-------------------------------------|---------|
| Cortical Area (mm <sup>2</sup> )           | 198.5 ± 73.86            | 183.8 ± 57.51                       | 0.4541  |
| Mean Glomerular Area (20 glomerula)        | 31,143 ± 9,659           | 30,791 ± 6,934                      | 0.8429  |
| Glomeruli                                  | 24.55 ± 4.99             | 23.40 ± 4.52                        | 0.7472  |
| Glomerular Density                         | 2.17 ± 0.55              | 2.36 ± 0.49                         | 0.0862  |
| Sclerotic Glomeruli, n                     | 45.11 ± 89.33            | 58.91 ± 95.02                       | 0.0566  |
| %Sclerotic Glomeruli                       | 10.79 ± 20.59            | 15.68 ± 25.22                       | 0.0491  |
| Non-sclerotic Glomeruli, n                 | 373.3 ± 196.8            | 361.5 ± 170.2                       | 0.9314  |
| %Interstitial Fibrosis and Tubular Atrophy | 21.16 ± 22.47            | 25.76 ± 30.50                       | 0.9050  |
| Microcystic Dilation, n(%)                 | 3 (6.67%)                | 9 (19.57%)                          | 0.0690  |
| Intimal Thickness LA mcm                   | 55.14 ± 34.38            | 64.50 ± 50.93                       | 0.6144  |

79

80

81 Supplemental Table IV: Causes of Death in Dialysis and Non-Dialysis Patients

|                                | <b>Total Study Cohort, n=764</b> | <b>Dialysis Patients, n=34</b> | <b>Non-Dialysis Patients, n=730</b> | <b>p-value (unadjusted)</b> |
|--------------------------------|----------------------------------|--------------------------------|-------------------------------------|-----------------------------|
| Sudden Cardiac Death           | 590 (77.2%)                      | 29 (85.3%)                     | 561 (76.8%)                         | 0.2511                      |
| Coronary Death                 | 293 (38.4%)                      | 12 (35.3%)                     | 281 (38.5%)                         | 0.7077                      |
| Intracoronary Thrombosis       | 185 (24.2%)                      | 9 (26.5%)                      | 176 (24.1%)                         | 0.7534                      |
| <i>Rupture</i>                 | 124 (16.2%)                      | 4 (11.8%)                      | 120 (16.4%)                         | 0.4700                      |
| <i>Erosion</i>                 | 57 (7.5%)                        | 3 (8.8%)                       | 54 (7.4%)                           | 0.7570                      |
| <i>Calcified Nodules</i>       | 4 (0.5%)                         | 2 (5.9%)                       | 2 (0.3%)                            | <0.0001                     |
| Non-thrombotic CAD             | 106 (13.9%)                      | 3 (8.8%)                       | 103 (14.1%)                         | 0.3834                      |
| Coronary Dissection            | 2 (0.3%)                         | 0 (0.0%)                       | 2 (0.3%)                            | NA                          |
| Cardiac but Non-Coronary Death | 297 (38.9%)                      | 17 (50.0%)                     | 280 (38.4%)                         | 0.1734                      |
| Sudden Non-Cardiac Death       | 174 (22.8%)                      | 5 (14.7%)                      | 169 (23.2%)                         | 0.2511                      |

82

83

## Supplemental Table V: eQTL SNP rs136164 Genotypes

|                                                   | Total Study Cohort, n=375 | Homozygous Reference Allele, n=78 | Heterozygous, n=190   | Homozygous Alternative Allele, n=107 | p-value (un-adjusted) |
|---------------------------------------------------|---------------------------|-----------------------------------|-----------------------|--------------------------------------|-----------------------|
| <b>Demographics</b>                               |                           |                                   |                       |                                      |                       |
| Age (mean ± SD)                                   | 46.82 ± 12.42             | 44.86 ± 10.75                     | 47.55 ± 12.96         | 46.95 ± 12.54                        | 0.3353                |
| Male Sex                                          | 263 (70.1%)               | 54 (69.2%)                        | 147 (77.4%)           | 62 (57.9%)                           | 0.0021                |
| BMI, kg/m <sup>2</sup> (mean ± SD)                | 30.46 ± 8.39              | 30.42 ± 7.44                      | 29.98 ± 7.85          | 31.34 ± 9.84                         | 0.6197                |
| <b>Risk factors</b>                               |                           |                                   |                       |                                      |                       |
| Hypertension                                      | 254 (67.7%)               | 56 (71.8%)                        | 126 (66.3%)           | 72 (67.3%)                           | 0.6794                |
| Hyperlipidemia                                    | 64 (17.1%)                | 14 (17.9%)                        | 36 (18.9%)            | 14 (13.1%)                           | 0.4239                |
| Diabetes Mellitus                                 | 64 (17.1%)                | 9 (11.5%)                         | 37 (19.5%)            | 18 (16.8%)                           | 0.2914                |
| Smoking                                           | 42 (11.2%)                | 6 (7.7%)                          | 21 (11.1%)            | 15 (14.0%)                           | 0.4017                |
| Kidney disease                                    | 33 (8.8%)                 | 7 (9.0%)                          | 15 (7.9%)             | 11 (10.3%)                           | 0.7830                |
| Dialysis                                          | 18 (4.8%)                 | 3 (3.8%)                          | 6 (3.2%)              | 9 (8.4%)                             | 0.1147                |
| History of drug abuse                             | 49 (13.1%)                | 14 (17.9%)                        | 24 (12.6%)            | 11 (10.3%)                           | 0.3013                |
| Serum Cholesterol (mg/dL)                         | 206.28 ± 77.05            | 208.75 ± 50.63 (n=12)             | 203.55 ± 80.90 (n=53) | 212.05 ± 82.40 (n=20)                | 0.6143                |
| Serum Creatinine (mg/dL)                          | 2.59 ± 2.10               | 2.48 ± 1.26 (n=39)                | 2.12 ± 1.00 (n=78)    | 3.45 ± 3.36 (n=48)                   | 0.0415                |
| <b>Cause of Death</b>                             |                           |                                   |                       |                                      |                       |
| Sudden Cardiac Death                              | 350 (93.3%)               | 75 (96.2%)                        | 177 (93.2%)           | 98 (91.6%)                           | 0.4653                |
| Coronary Death                                    | 202 (53.9%)               | 44 (56.4%)                        | 104 (54.7%)           | 54 (50.5%)                           | 0.6844                |
| Intracoronary Thrombosis                          | 131 (34.9%)               | 30 (38.5%)                        | 69 (36.3%)            | 32 (29.9%)                           | 0.4114                |
| <i>Rupture</i>                                    | 85 (22.7%)                | 17 (21.8%)                        | 48 (25.3%)            | 20 (18.7%)                           | 0.4212                |
| <i>Erosion</i>                                    | 42 (11.2%)                | 13 (16.7%)                        | 18 (9.5%)             | 11 (10.3%)                           | 0.2227                |
| <i>Calcified Nodules</i>                          | 4 (1.1%)                  | 0 (0.0%)                          | 3 (1.6%)              | 1 (0.9%)                             | NA                    |
| Non-thrombotic CAD                                | 70 (18.7%)                | 14 (17.9%)                        | 34 (17.9%)            | 22 (20.6%)                           | 0.8378                |
| Coronary Dissection                               | 1 (0.3%)                  | 0 (0.0%)                          | 1 (0.5%)              | 0 (0.0%)                             | NA                    |
| Cardiac but Non-Coronary Death                    | 148 (39.5%)               | 31 (39.7%)                        | 73 (38.4%)            | 44 (41.1%)                           | 0.8994                |
| Sudden Non-Cardiac Death                          | 25 (6.7%)                 | 3 (3.8%)                          | 13 (6.8%)             | 9 (8.4%)                             | 0.4653                |
| <b>Degree of Atherosclerosis</b>                  |                           |                                   |                       |                                      |                       |
| None (0 - 24% cross-sectional stenosis)           | 95 (25.3%)                | 23 (29.5%)                        | 47 (24.7%)            | 25 (23.4%)                           | 0.6168                |
| Mild (25 – 50% cross-sectional stenosis)          | 33 (8.8%)                 | 5 (6.4%)                          | 20 (10.6%)            | 8 (7.5%)                             | 0.4738                |
| Moderate (50 – 74% cross-sectional stenosis)      | 47 (12.5%)                | 6 (7.7%)                          | 19 (10.0%)            | 22 (20.6%)                           | 0.0107                |
| Severe (≥75% cross-sectional stenosis)            | 200 (53.5%)               | 44 (56.4%)                        | 104 (54.7%)           | 52 (48.6%)                           | 0.4938                |
| <b>Mean %cross-sectional luminal narrowing</b>    |                           |                                   |                       |                                      |                       |
| LAD (%)                                           | 49.16 ± 36.53             | 50.19 ± 37.83                     | 49.05 ± 37.33         | 48.60 ± 12.55                        | 0.8109                |
| LCA (%)                                           | 39.57 ± 38.02             | 38.72 ± 37.94                     | 39.34 ± 39.14         | 40.59 ± 36.35                        | 0.9685                |
| RCA (%)                                           | 43.31 ± 38.01             | 43.27 ± 39.03                     | 44.03 ± 38.22         | 42.06 ± 37.19                        | 0.2773                |
| <b>Number of vessels with any atherosclerosis</b> |                           |                                   |                       |                                      |                       |

|   |             |            |            |            |        |
|---|-------------|------------|------------|------------|--------|
| 0 | 102 (27.2%) | 23 (29.5%) | 53 (27.9%) | 26 (24.3%) | 0.7022 |
| 1 | 37 (9.9%)   | 6 (7.7%)   | 20 (10.5%) | 11 (10.3%) | 0.7679 |
| 2 | 39 (10.4%)  | 10 (12.8%) | 19 (10.0%) | 10 (9.3%)  | 0.7223 |
| 3 | 197 (52.5%) | 39 (50.0%) | 98 (51.6%) | 60 (56.1%) | 0.6675 |

**Number of vessels with cross-sectional luminal narrowing  $\geq$ 75% in histology**

|   |             |            |            |            |        |
|---|-------------|------------|------------|------------|--------|
| 0 | 175 (46.7%) | 34 (43.6%) | 86 (45.3%) | 55 (51.4%) | 0.4939 |
| 1 | 67 (17.9%)  | 14 (17.9%) | 33 (17.4%) | 20 (18.7%) | 0.9598 |
| 2 | 81 (21.6%)  | 19 (24.4%) | 40 (21.1%) | 22 (20.6%) | 0.7975 |
| 3 | 52 (13.9%)  | 11 (14.1%) | 31 (16.3%) | 10 (9.3%)  | 0.2480 |

**APOL1 risk alleles**

|   |             |            |            |            |        |
|---|-------------|------------|------------|------------|--------|
| 0 | 138 (36.8%) | 33 (42.3%) | 70 (36.8%) | 35 (32.7%) | 0.4092 |
| 1 | 181 (48.3%) | 36 (46.2%) | 92 (48.4%) | 53 (49.5%) | 0.9004 |
| 2 | 56 (14.9%)  | 9 (11.5%)  | 28 (14.7%) | 19 (17.8%) | 0.5003 |



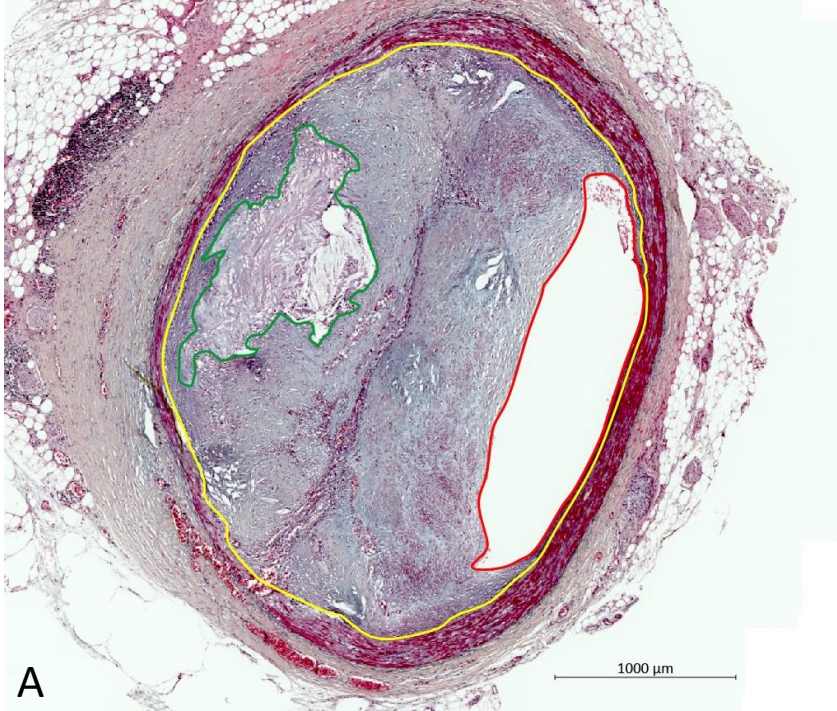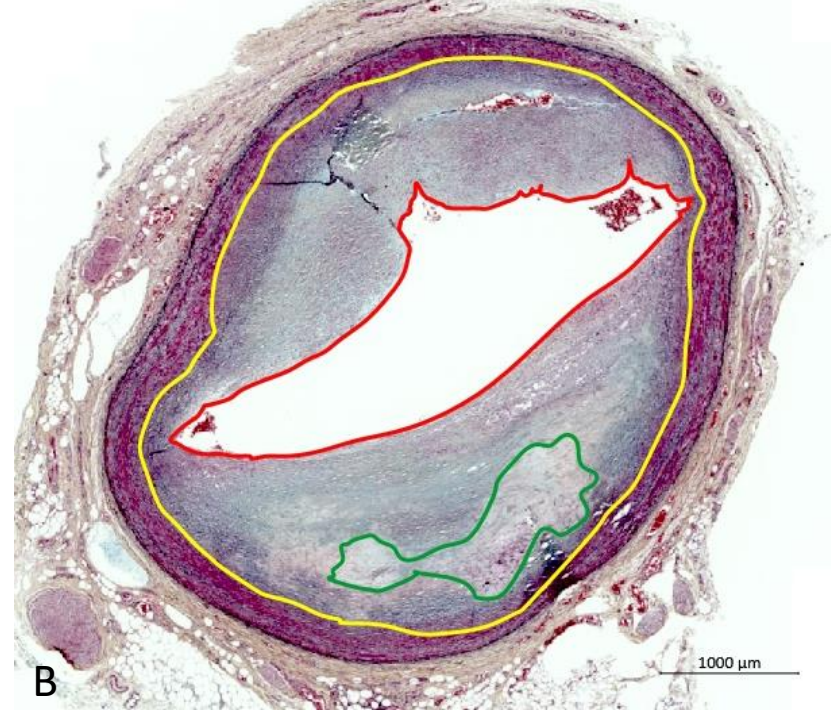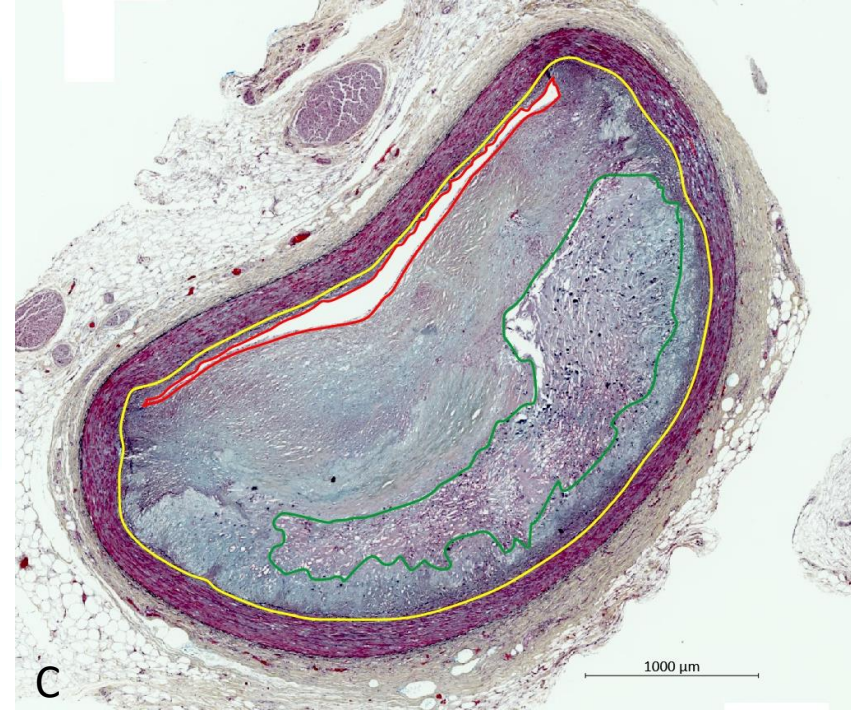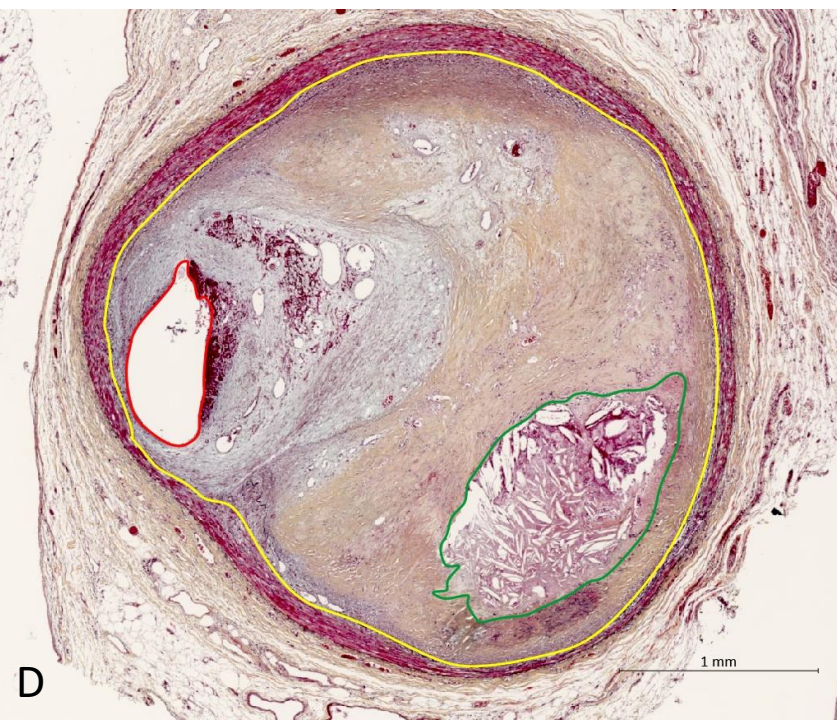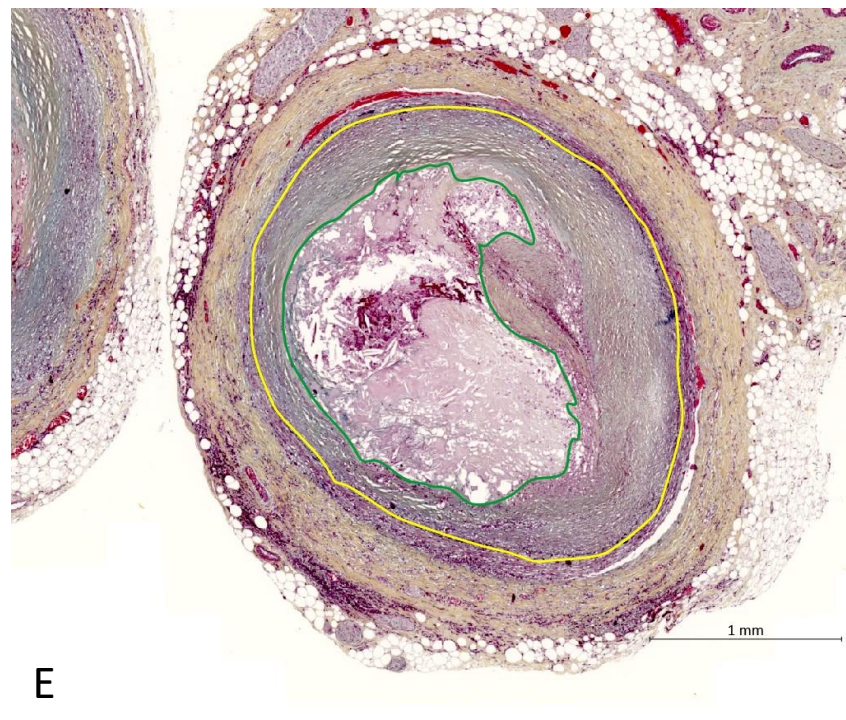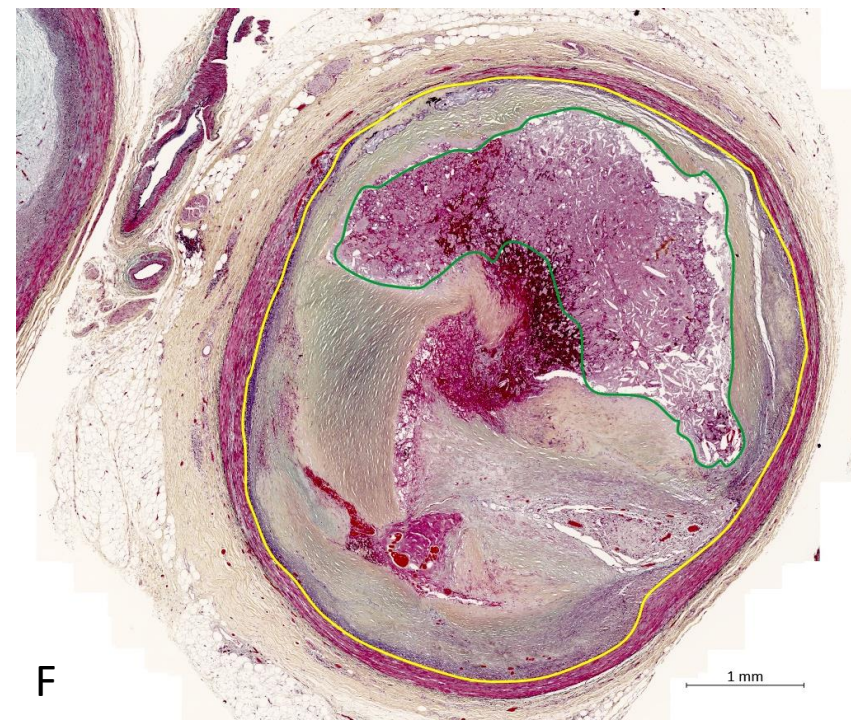



A

## APOA1 in Stable Human Coronary Plaques

APOA1 DAPI

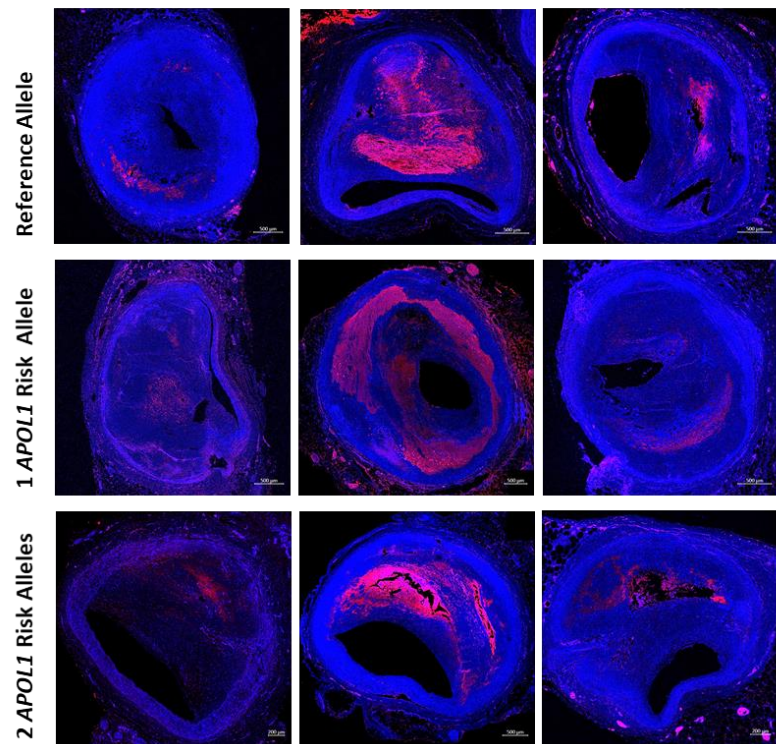

B

## APOA1 in Ruptured Human Coronary Arteries

APOA1 DAPI

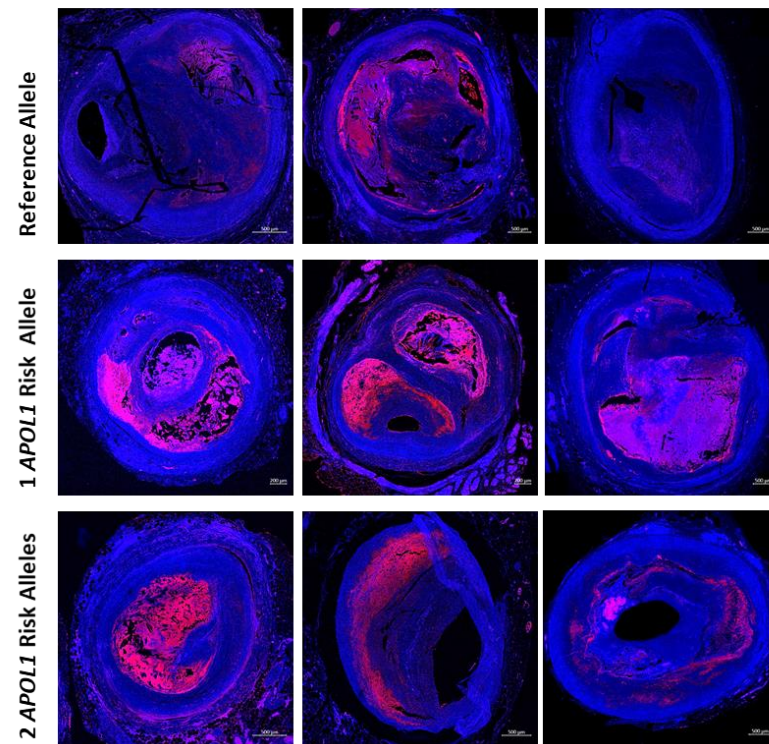

C

## APOA1-positive Plaque Area in Stable Plaques

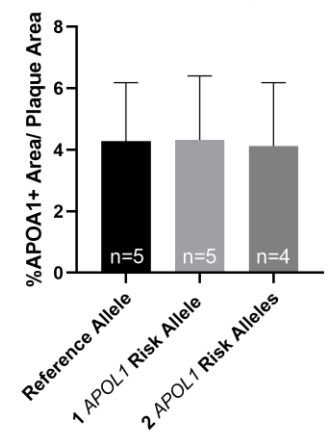

D

## APOA1-positive Plaque Area in Ruptured Plaques

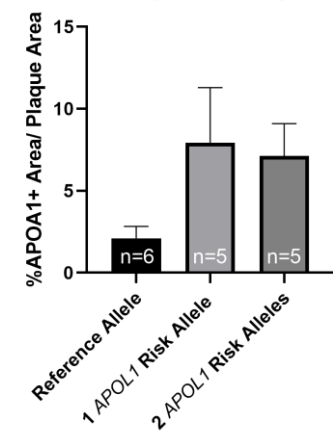

E

## Correlation APOA1/APOL1

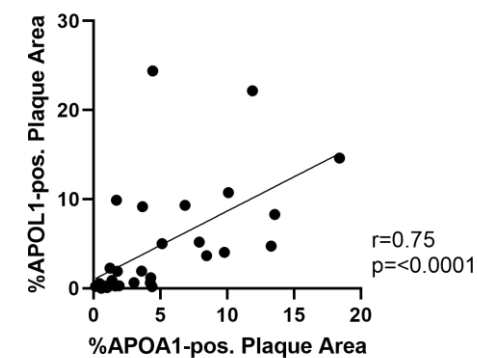



**A** Human Coronary Stable Plaques

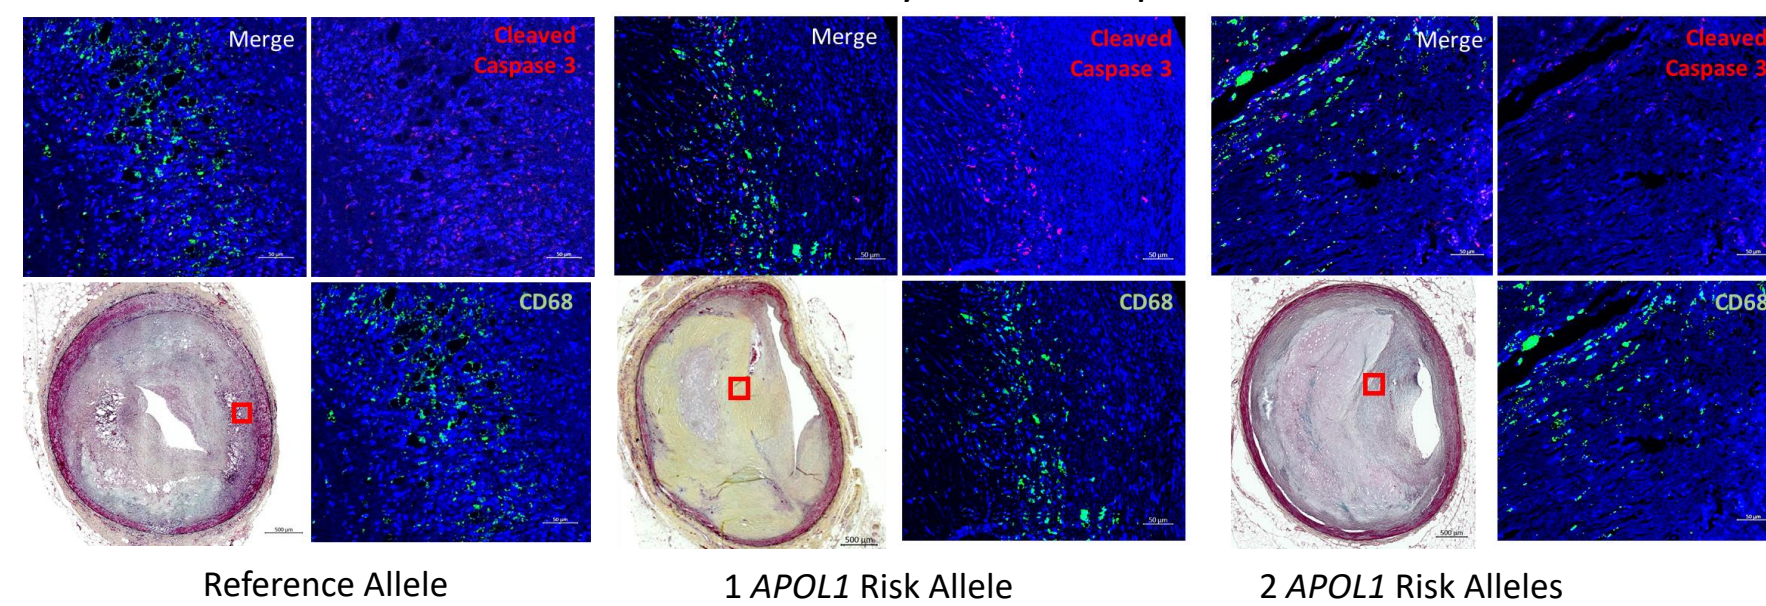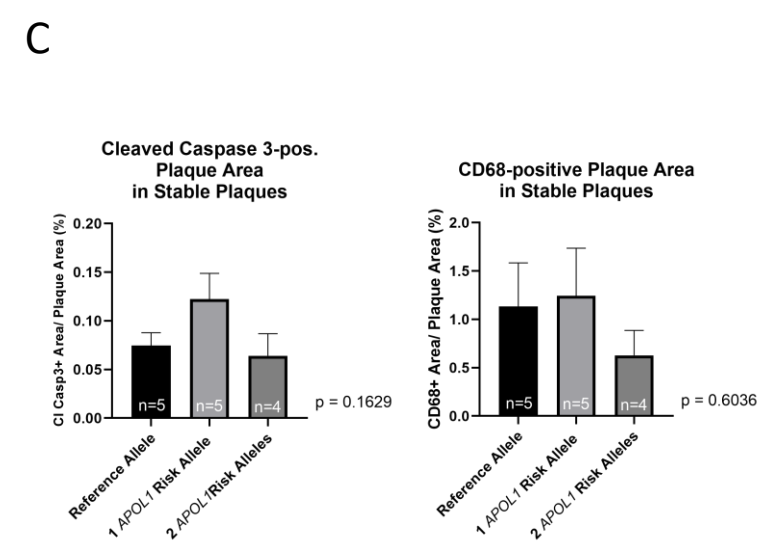

**B** Human Coronary Ruptured Plaques

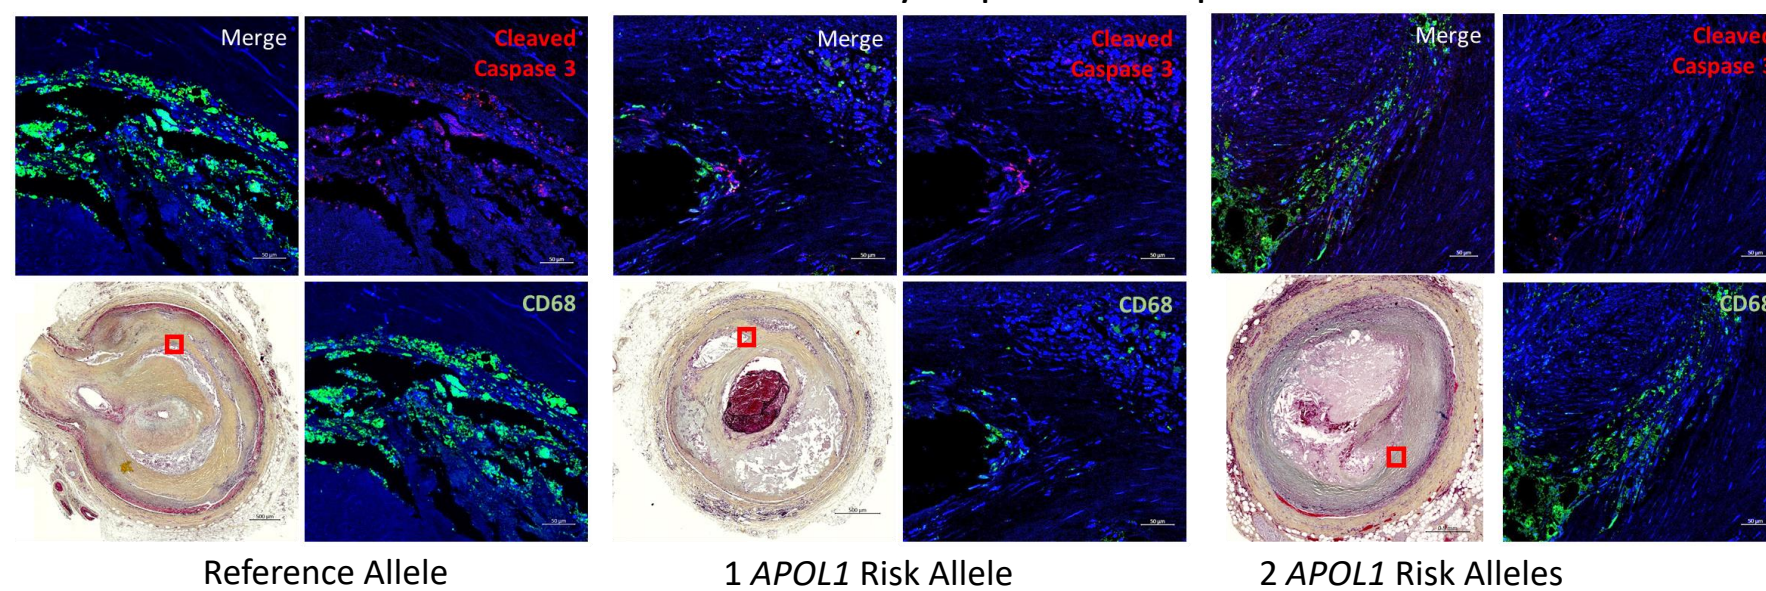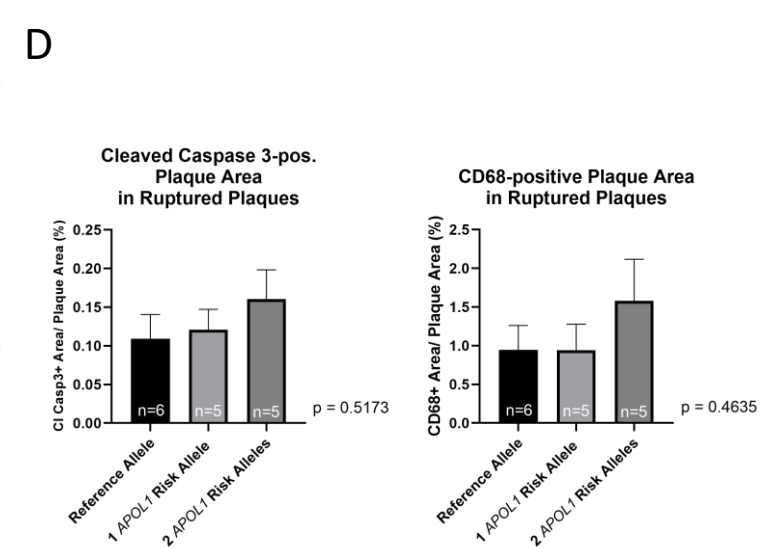

**E** Human Coronary Stable Plaques

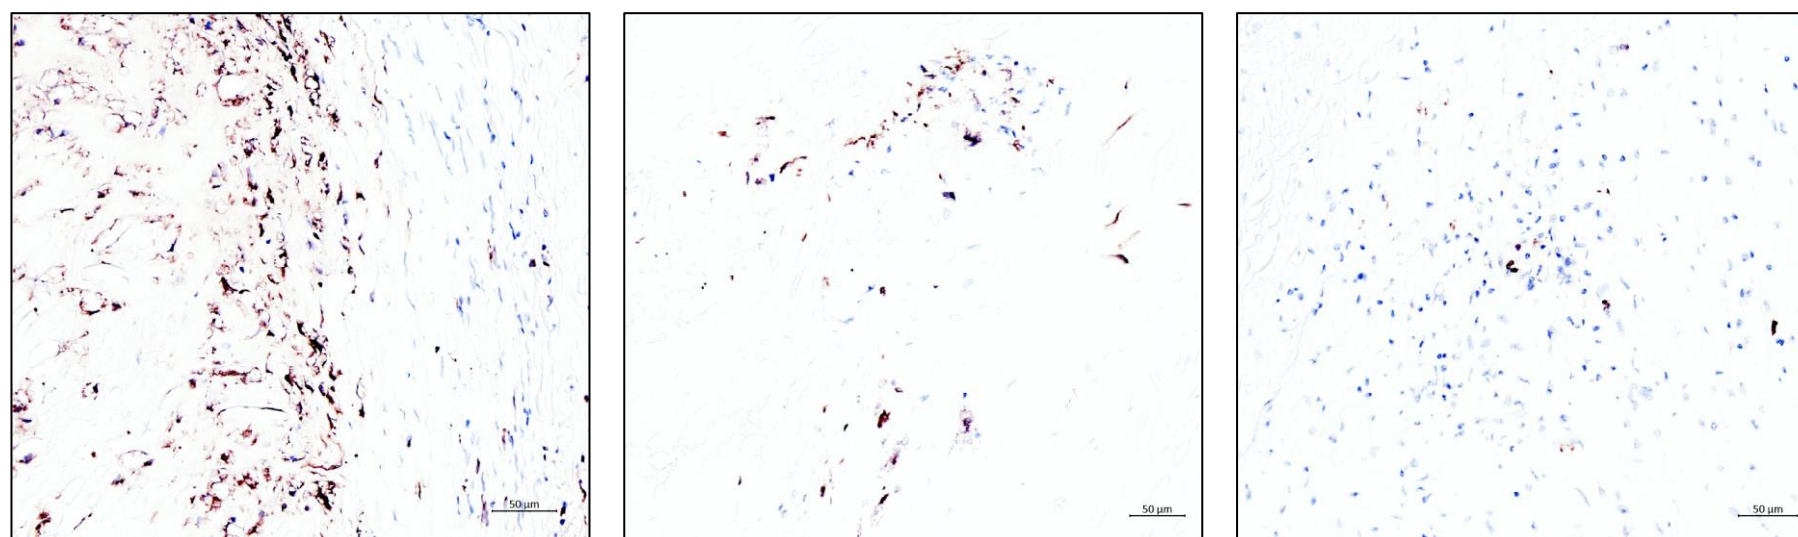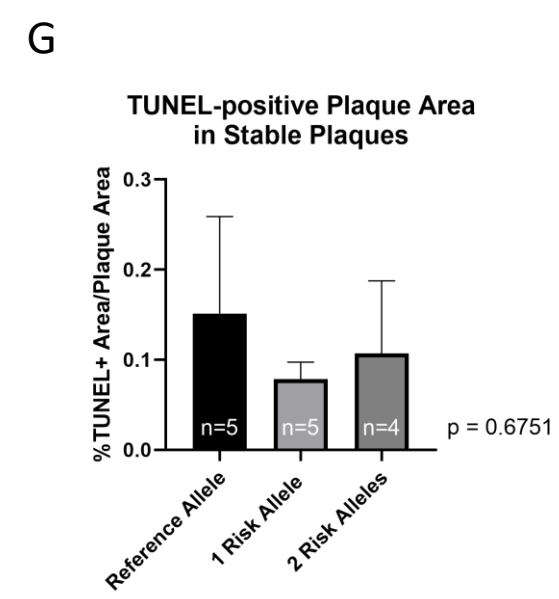

**F** Human Coronary Ruptured Plaques

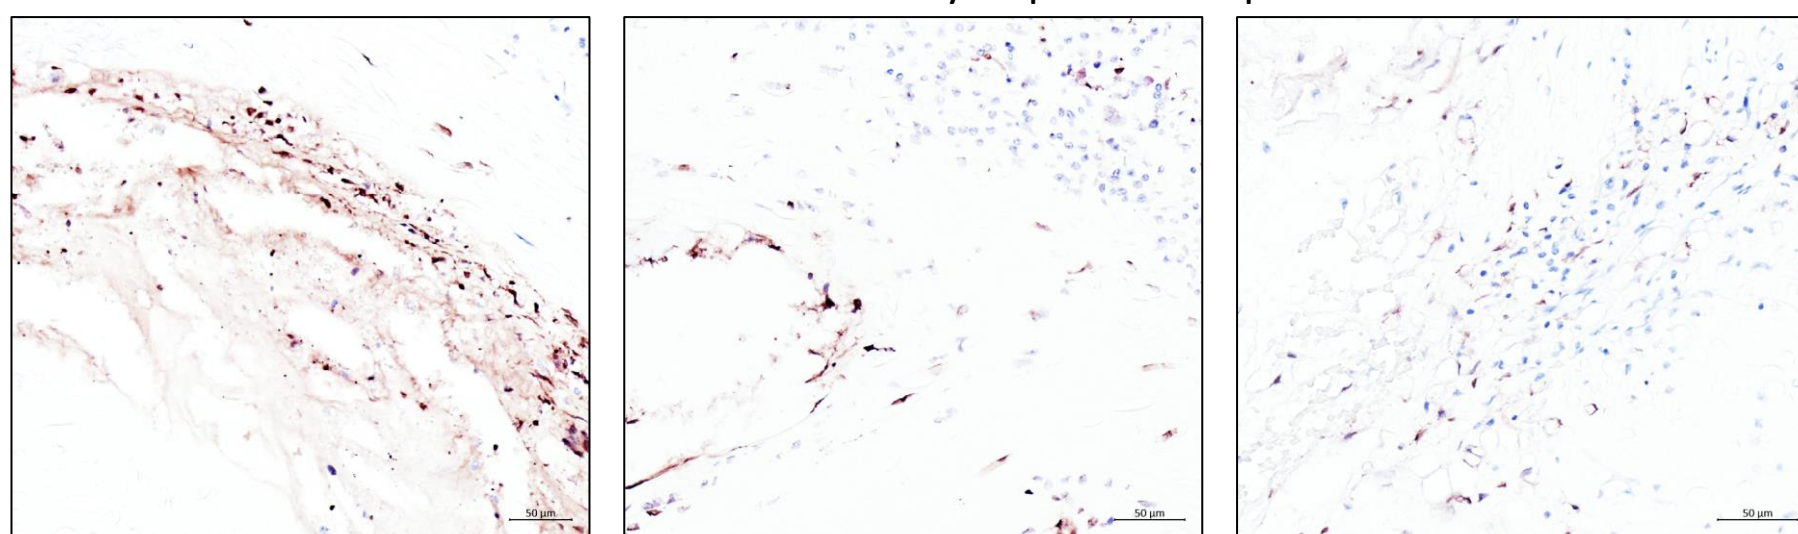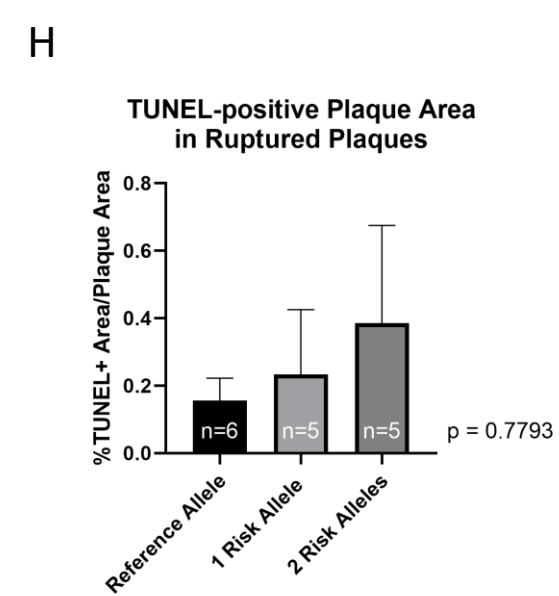

Supplement: NIHMS1704179-supplement-Supplemental_Publication_Material.pdf [file NIHMS1704179-supplement-Supplemental_Publication_Material.pdf]
